# Supplementary material
Source: MDPI journal article supplement (https://www.mdpi.com/2071-1050/14/5/2829)
Supplement: s1 [file s1]

Supplementary Materials for the Article:

E. Michaud, A. Aschenbroich, O. Gauthier, F. Fromard, J.Y. Aller, R.C. Aller, G. Brunier, E.J. Anthony, A. Gardel, V. Le Garrec, A. Leynaert, G. Thouzeau. The Codevelopment of Mangroves and Infaunal Community Diversity in Response to the Natural Dynamics of Mud Deposition in French Guiana. *Sustainability* **2021**, *14*, 2829. <https://doi.org/10.3390/su14052829>

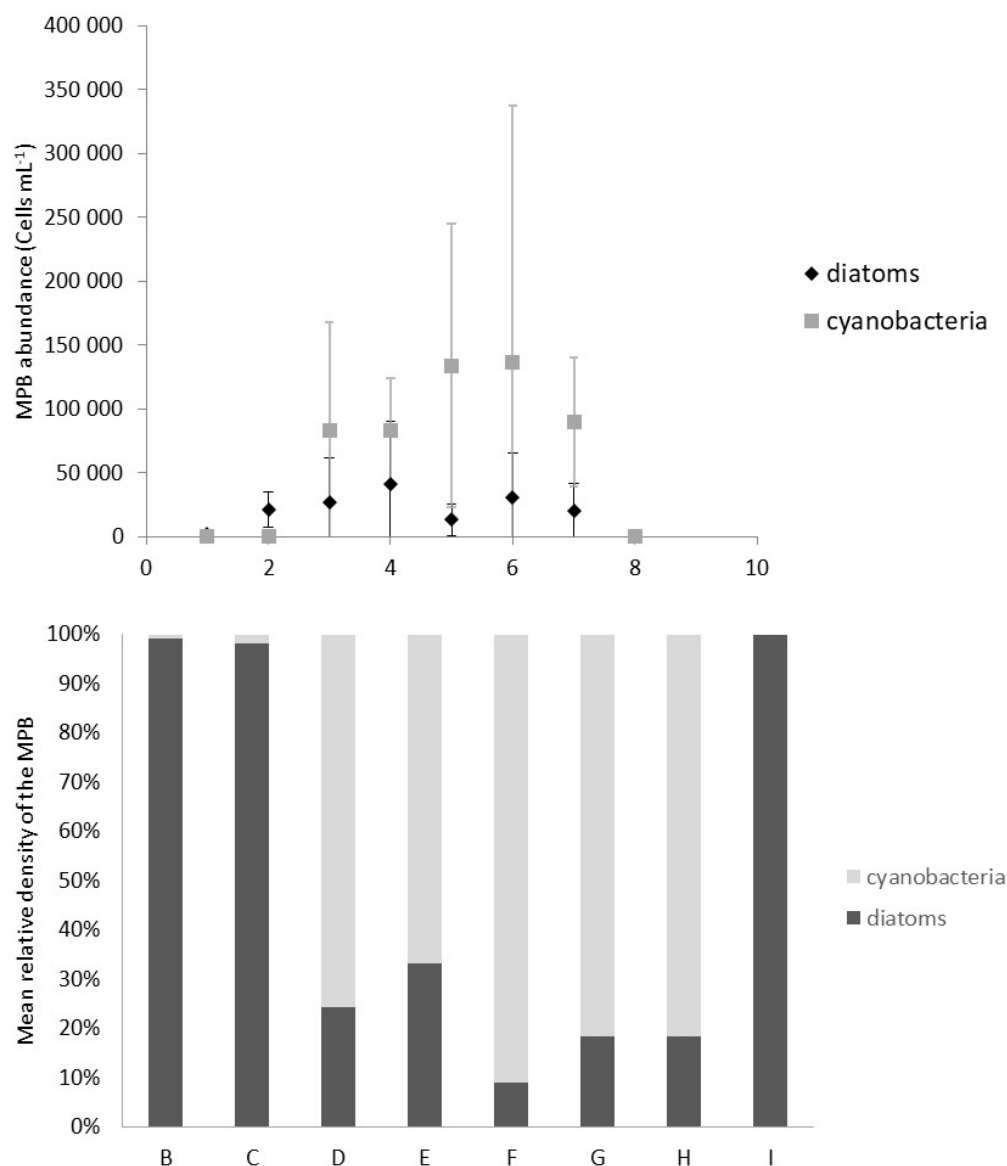

**Figure S1:** Microphytobenthos (diatoms and cyanobacteria), a) mean abundances (Cells mL<sup>-1</sup>) and b) mean relative density (%) along the mangrove maturation gradient (transects B-I; mean  $\pm$  SD, 2 < n < 6).

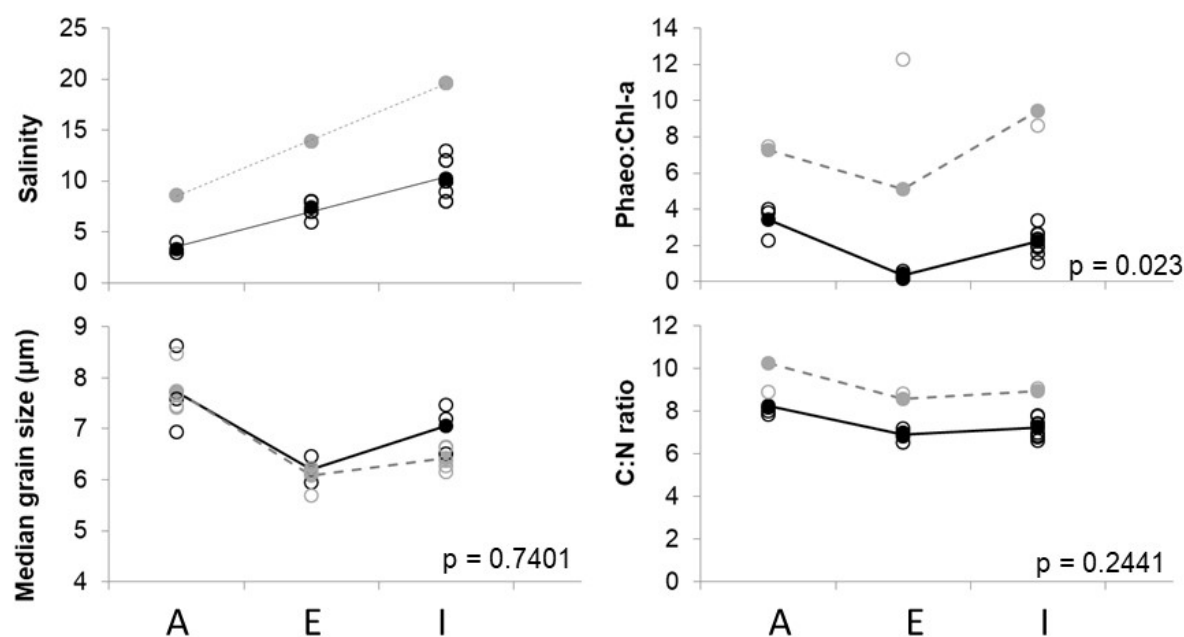

**Figure S2:** Relationships between mangrove stages and surface sediment (black symbols) and 18 centimeter-depth averaged (grey dots) parameters at transects A, E and I. Empty and filled dots denote replicates and means, respectively. The significance values of the ANCOVAs are shown on the graphs. ANCOVA was not applied to salinity (no core replicates per transect).

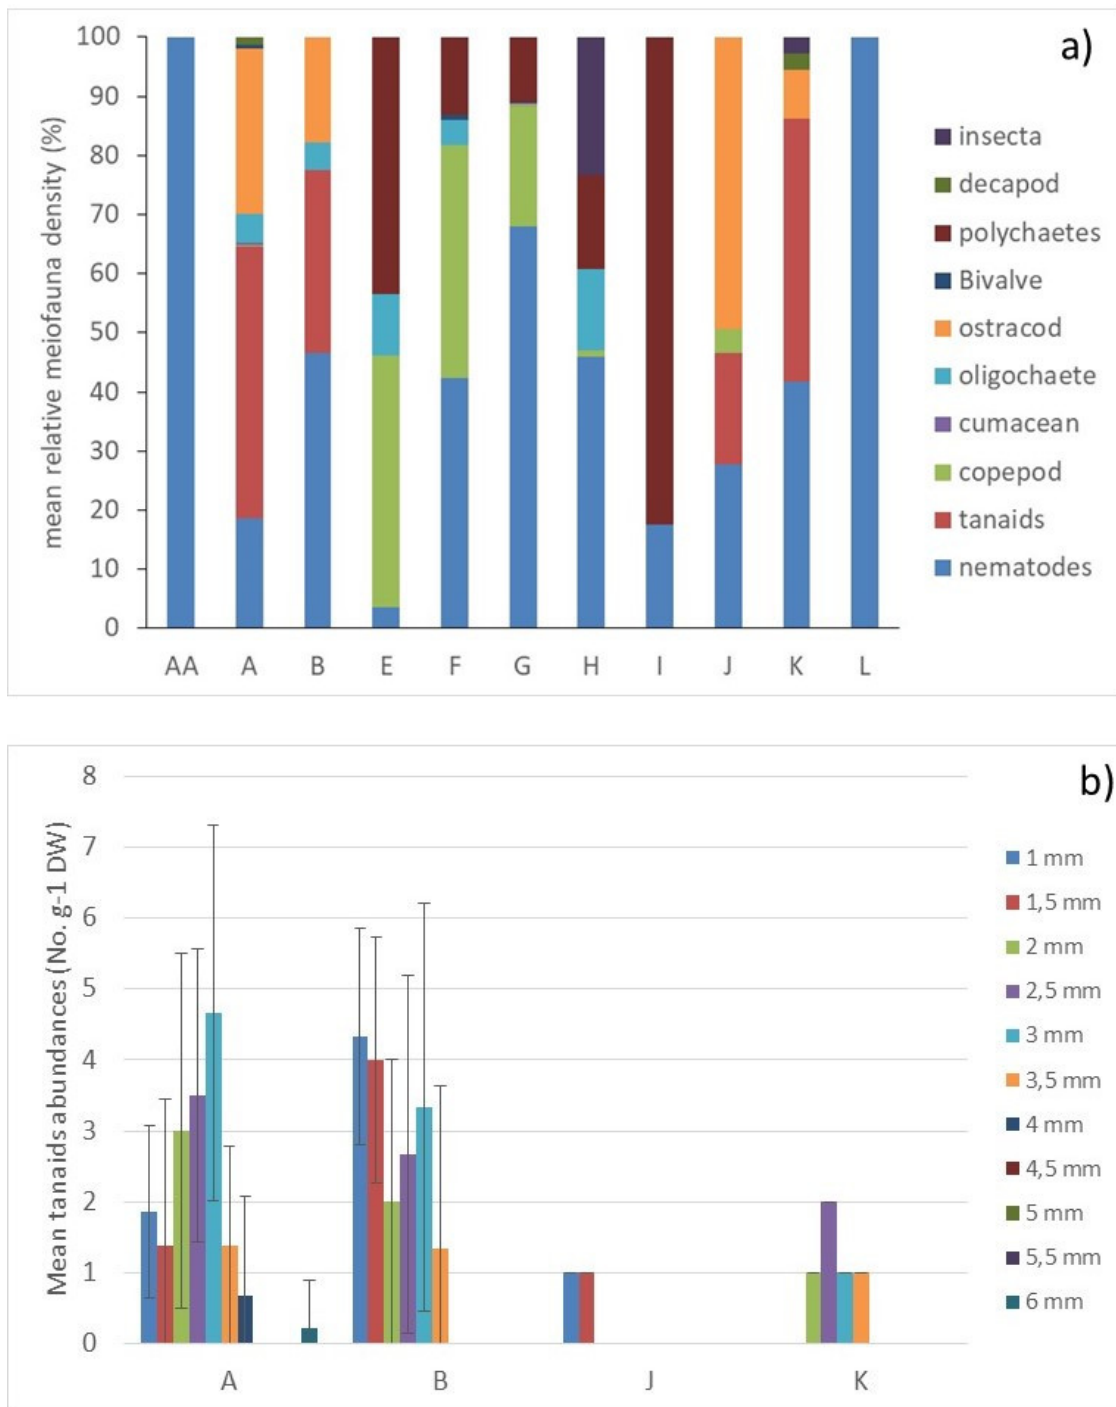

**Figure S3:** a) mean relative density ( $n \leq 9$ ; %) of the meiofauna OTUs at mobile mud stations (AA, J, K and L) and at some consolidated stations of the mangrove maturation gradient (A, B, E, F, G, H and I). b) mean abundances of tanaids (No g<sup>-1</sup> per dry weight of sediment DW) per size class (1 to 6 mm) at the stations (A, B, J, K) containing tanaids (mean  $\pm$  SD,  $n \leq 6$ ).

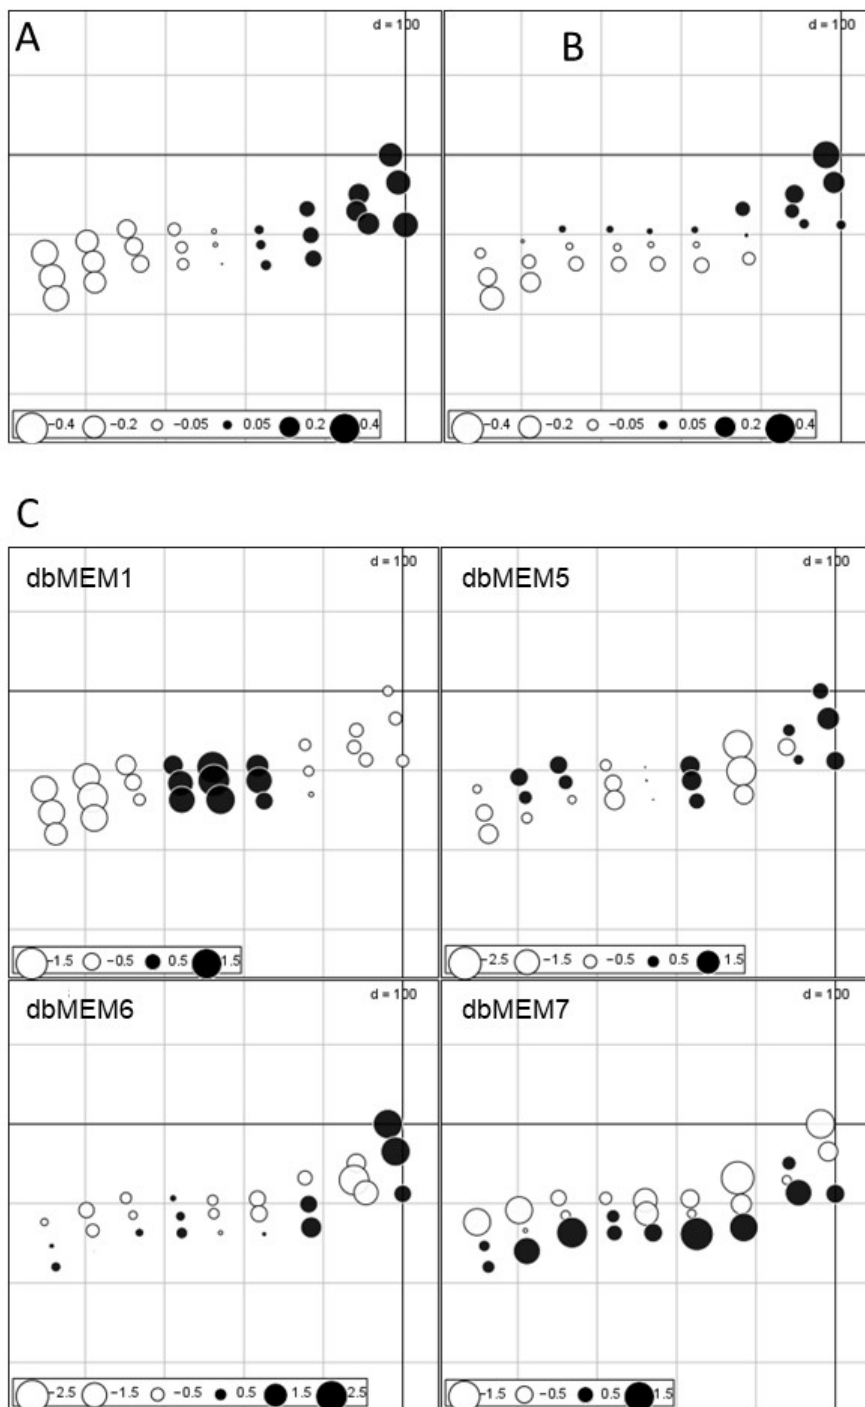

**Figure S4:** Bubble plot of predicted position (linear constraints) on the only canonical axis for the linear models of Hellinger-transformed abundances as a function of A) East-West and B) South-North coordinates. C) Bubble plots depicting the selected positive dbMEM spatial Eigen functions after forward selection. The dbMEM1, dbMEM5 and dbMEM6 were included in the models for de-trended Hellinger-transformed abundances and biovolumes. The dbMEM7 was only included in the model of abundances.

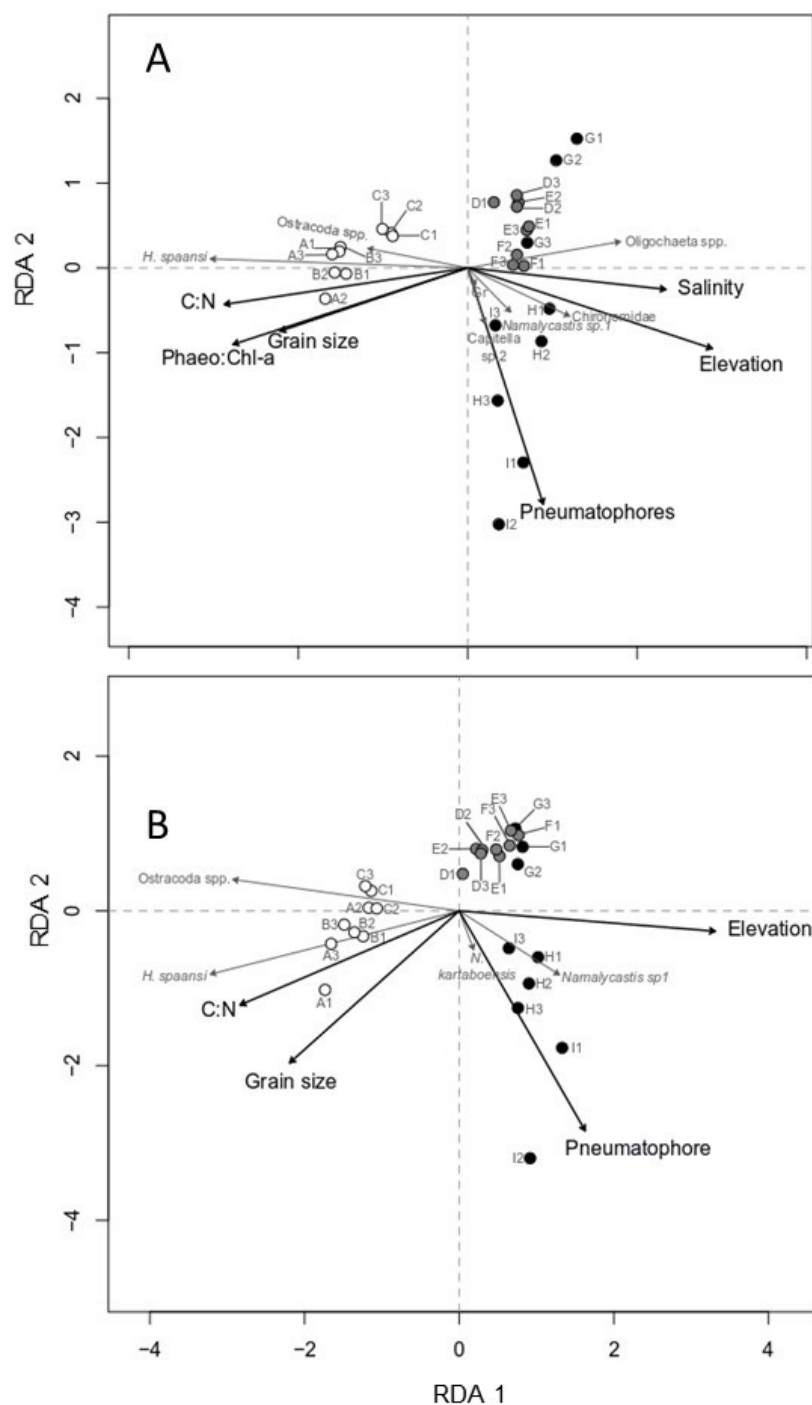

**Figure S5:** RDA correlation triplot of infaunal community data and selected environmental variables based on Hellinger transformed (A) abundance and (B) biovolume infaunal data. Stations of the three groups of transects are represented by specific colored circles (white: A-C, group 1; grey: D-G, group 2; black: H-I, group 3). “Grain size” refers to median grain size, “Pneumatophore” refers to roots density, “Elevation” refers to substrate height. In the top graph “Gr” denotes three taxa clustered too close to be distinguished *Gastropoda* sp.1, *Bivalvia* sp.1 and *Melitidae* sp.1.

**Table S1 :** Taxonomic list of the OTUs (nd : not defined)

| Phylum     | Class        | family          | OTUs                              |
|------------|--------------|-----------------|-----------------------------------|
| Annelida   | Clitellata   | nd              | <i>Oligochaeta spp.</i>           |
| Annelida   | Polychaeta   | Capitellidae    | <i>Capitella indet</i>            |
| Annelida   | Polychaeta   | Capitellidae    | <i>Capitella sp.1</i>             |
| Annelida   | Polychaeta   | Capitellidae    | <i>Capitella sp.2</i>             |
| Annelida   | Polychaeta   | Nereididae      | <i>Namalycastis sp.1</i>          |
| Annelida   | Polychaeta   | Nereididae      | <i>Namalycastis kartaboensis</i>  |
| Annelida   | Polychaeta   | Nereididae      | <i>Neanthes sp.1</i>              |
| Annelida   | Polychaeta   | Capitellidae    | <i>Notomastus sp.1</i>            |
| Annelida   | Polychaeta   | Spionidae       | <i>Pseudopolydora sp.1</i>        |
| Annelida   | Polychaeta   | Pilargidae      | <i>Sigambra sp1</i>               |
| Arthropoda | Arachnida    | nd              | <i>Acarina spp.</i>               |
| Arthropoda | Arachnida    | nd              | <i>Aranae spp.</i>                |
| Arthropoda | Collembola   | Isotomidae      | <i>Isotomidae spp</i>             |
| Arthropoda | Insecta      | Ceratopogonidae | <i>Ceratopogonidae 1 (larvae)</i> |
| Arthropoda | Insecta      | Chironomidae    | <i>Chironomidae 1 (larvae)</i>    |
| Arthropoda | Insecta      | nd              | <i>Coleoptera ind</i>             |
| Arthropoda | Insecta      | nd              | <i>Coleoptera sp.2</i>            |
| Arthropoda | Insecta      | nd              | <i>Coleoptera sp.4</i>            |
| Arthropoda | Insecta      | nd              | <i>Diptera 1 (adult)</i>          |
| Arthropoda | Insecta      | nd              | <i>Diptera 2 (adult)</i>          |
| Arthropoda | Insecta      | nd              | <i>Diptera 3 (adult)</i>          |
| Arthropoda | Insecta      | nd              | <i>Diptera 4 (adult)</i>          |
| Arthropoda | Insecta      | nd              | <i>Diptera indet.1 (larvae)</i>   |
| Arthropoda | Insecta      | nd              | <i>Diptera indet.2 (larvae)</i>   |
| Arthropoda | Insecta      | nd              | <i>Heteroptera sp.1</i>           |
| Arthropoda | Insecta      | nd              | <i>Insecta sp.1</i>               |
| Arthropoda | Insecta      | nd              | <i>Insecta sp.2</i>               |
| Arthropoda | Insecta      | nd              | <i>Scolitidae sp.1</i>            |
| Arthropoda | Insecta      | nd              | <i>Tabamidae 1 (larvae)</i>       |
| Arthropoda | Insecta      | nd              | <i>Thysanoptera sp.1</i>          |
| Arthropoda | Malacostraca | nd              | <i>Amphipoda sp.1</i>             |
| Arthropoda | Malacostraca | Parapseudidae   | <i>Halmyrapseudes spaansi</i>     |
| Arthropoda | Malacostraca | Parapseudidae   | <i>Discapseudes surinamensis</i>  |
| Arthropoda | Malacostraca | melitidae       | <i>Melitidae sp.1</i>             |
| Arthropoda | Malacostraca | Melitidae       | <i>Melitidae sp.2</i>             |
| Arthropoda | Malacostraca | nd              | <i>Isopode sp1</i>                |

|               |                |               |                               |
|---------------|----------------|---------------|-------------------------------|
| Arthropoda    | Malacostraca   | nd            | <i>Isopode sp2</i>            |
| Arthropoda    | Maxillopoda    | nd            | <i>Copepoda</i>               |
| Arthropoda    | Malacostraca   | Grapsidae     | <i>Goniopsis cruentata</i>    |
| Arthropoda    | Malacostraca   | Ocypodidae    | <i>Uca cumulanta</i>          |
| Arthropoda    | Malacostraca   | Ocypodidae    | <i>Uca mordax</i>             |
| <b>Phylum</b> | <b>Class</b>   | <b>family</b> | <b>OTUs</b>                   |
| Arthropoda    | Malacostraca   | Talitridae    | <i>Talitridae sp.1</i>        |
| Arthropoda    | Ostracoda      | nd            | <i>Ostracoda spp.</i>         |
| Chordata      | Actinopterygii | Gobiidae      | <i>Gobionellus oceanicus</i>  |
| Cnidaria      | Anthozoa       | nd            | <i>Octocorallia sp.</i>       |
| Cnidaria      | Anthozoa       | nd            | <i>Hectocorallia sp.</i>      |
| Mollusca      | Bivalvia       | Cyrenidae     | <i>Polymesoda aequilatera</i> |
| Mollusca      | Bivalvia       | nd            | <i>Bivalvia sp1</i>           |
| Mollusca      | Bivalvia       | nd            | <i>Bivalvia sp2</i>           |
| Mollusca      | Bivalvia       | nd            | <i>Bivalvia sp3</i>           |
| Mollusca      | Gastropoda     | nd            | <i>Gastropoda sp.1</i>        |
| Mollusca      | Gastropoda     | nd            | <i>Gastropoda sp.2</i>        |
| Nematoda      | Adenophorea    | nd            | <i>Adenophorea</i>            |
| Nemerta       | Nemerta        | nd            | <i>Nemerta sp.1</i>           |
| Nemerta       | Nemerta        | nd            | <i>Nemerta sp.2</i>           |
| Plathelminthe | Turbellaria    | nd            | <i>Turbellaria</i>            |
| Sipuncula     | Sipuncula sp.  | nd            | <i>Sipuncula sp.</i>          |
